# Supplementary material for: Paclitaxel Reduces Tumor Growth by Reprogramming Tumor-Associated Macrophages to an M1 Profile in a TLR4-Dependent Manner
Source: Oxford University Press journal article supplement (doi:10.1158/0008-5472.can-17-3480), 2018-08-13
Supplement: 00085472can173480-sup-192137_2_supp_4810069_p9ymk3.pdf [file 00085472can173480-sup-192137_2_supp_4810069_p9ymk3.pdf]

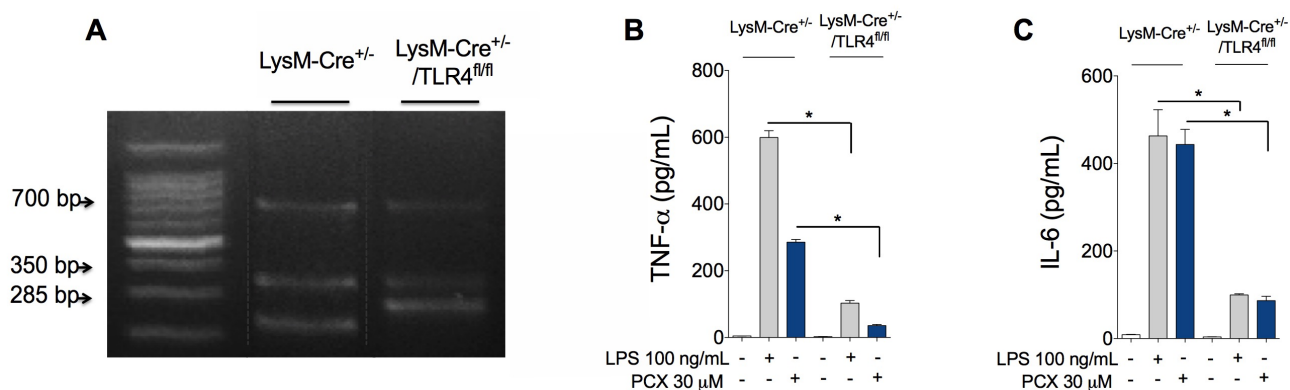

### Supplementary Figure S5. Generation of myeloid cell-specific TLR4

**knockout mice.** (A) Representative results of PCR-based genotyping: 1. The LysM-Cre heterozygous mice were detected by genomic PCR which gives rise two bands at 700-bp and 350-bp; 2. The homozygous TLR4-floxed mice were recognized by genomic PCR rendering a 285-bp band. To confirm the efficiency of LysM-Cre-mediated TLR4 loxP recombination in macrophages, BMDM from LysM-Cre<sup>+/-</sup> and LysM-Cre<sup>+/-</sup>/TLR4<sup>fl/fl</sup> mice were stimulated with LPS (100 ng/mL) or PCX (30 μM) and after 24h were measured the cytokines production in the supernatant: (B) TNF-α and (C) IL-6. All values are means ± SEM (n=3) \*P<0.05
